# Supplementary material for: C0.3N0.7Ti-SiC Toughed Silicon Nitride Hybrids with Non-Oxide Additives Ti3SiC2
Source: MDPI journal article supplement (doi:10.3390/ma13061428), 2020-03-20
Supplement: s1 [file s1]

# Supplementary Materials

Detailed information concerning quantitative report of  $\text{Si}_3\text{N}_4$ ,  $\text{C}_{0.3}\text{N}_{0.7}\text{Ti}$ , and  $\text{SiC}$  are illustrated as follow:

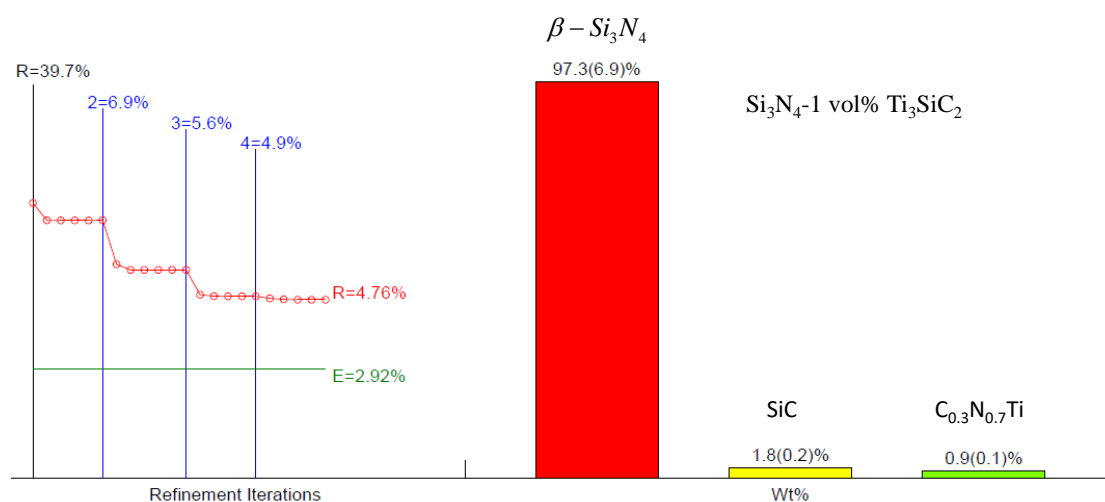

**Figure S1.** Quantitative report of  $\text{Si}_3\text{N}_4$ -1 vol.%  $\text{Ti}_3\text{SiC}_2$ .

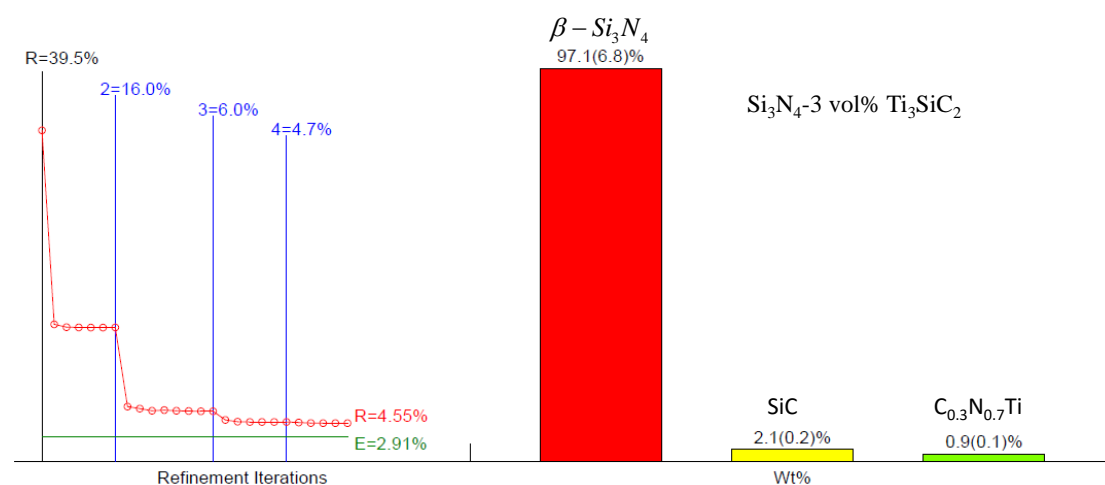

**Figure S2.** Quantitative report of  $\text{Si}_3\text{N}_4$ -3 vol.%  $\text{Ti}_3\text{SiC}_2$ .

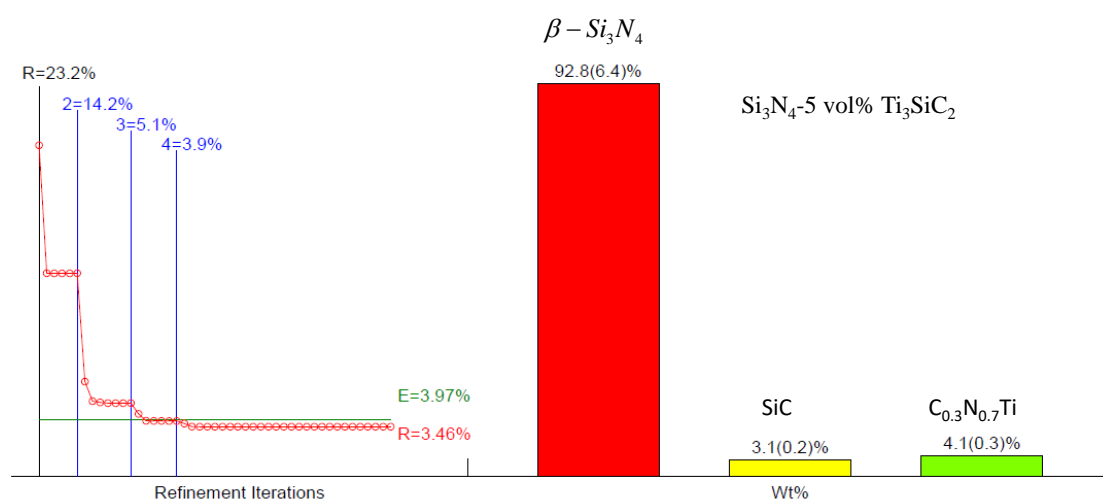

Figure S3. Quantitative report of  $\text{Si}_3\text{N}_4$ -5 vol%  $\text{Ti}_3\text{SiC}_2$ .

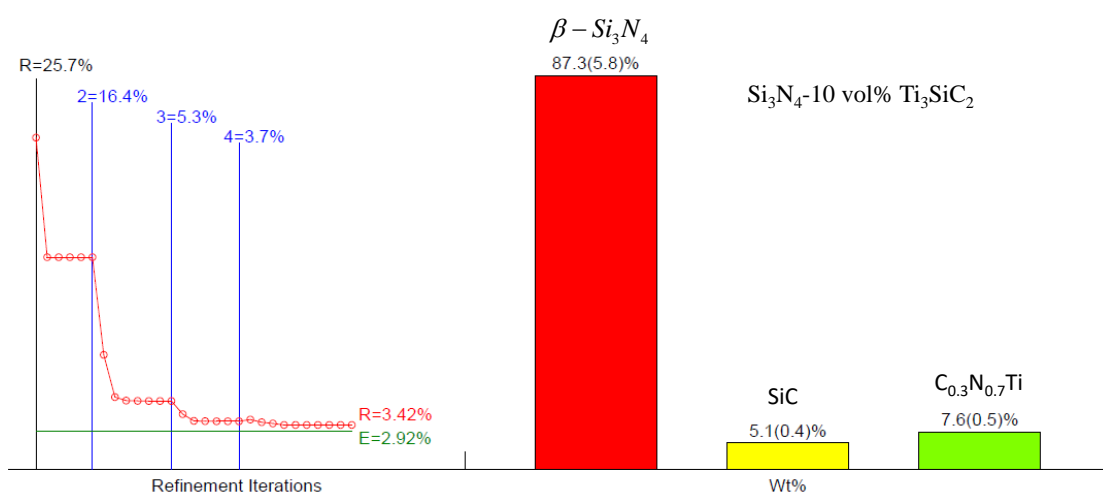

Figure S4. Quantitative report of  $\text{Si}_3\text{N}_4$ -10 vol.%  $\text{Ti}_3\text{SiC}_2$

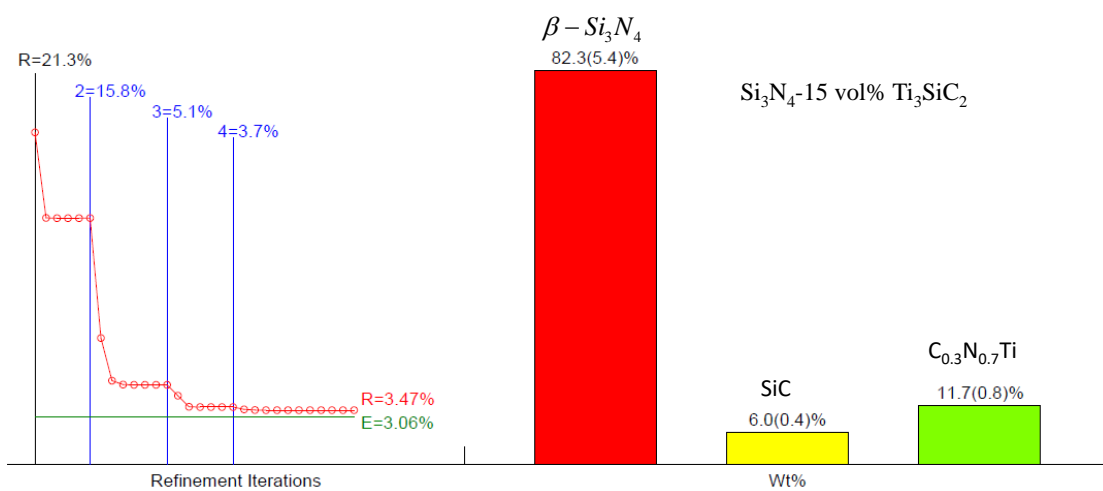

Figure S5. Quantitative report of  $\text{Si}_3\text{N}_4$ -15 vol.%  $\text{Ti}_3\text{SiC}_2$ .

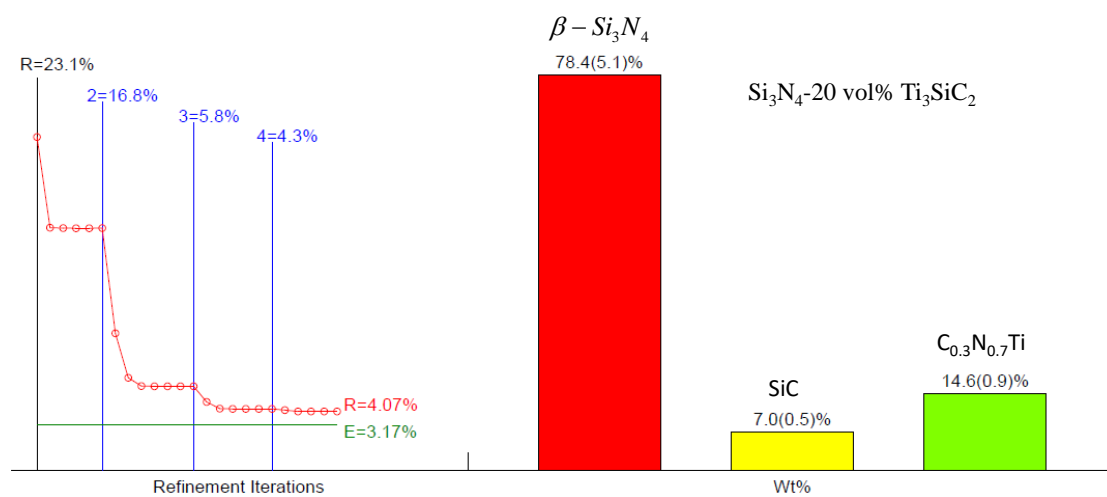

**Figure S6.** Quantitative report of  $\text{Si}_3\text{N}_4$ -20 vol.%  $\text{Ti}_3\text{SiC}_2$ .
